# Supplementary material for: Technical note: Determining chemical composition of atmospheric single particles by a standard-free mass calibration algorithm
Source: Copernicus journal article supplement (doi:10.5194/acp-24-7001-2024), 2024-06-18
Supplement: Supplementary file 1 [file acp-24-7001-2024-supplement.pdf]

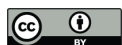

*Supplement of*

## **Technical note: Determining chemical composition of atmospheric single particles by a standard-free mass calibration algorithm**

**Shao Shi et al.**

*Correspondence to:* Jinghao Zhai ([zhaijh@sustech.edu.cn](mailto:zhaijh@sustech.edu.cn)) and Xin Yang ([yangx@sustech.edu.cn](mailto:yangx@sustech.edu.cn))

The copyright of individual parts of the supplement might differ from the article licence.

1 **Contents**

2 Section S1 .....2

3 Section S2 .....4

4 Section S3 .....6

5 Section S4 .....7

6 Figure S1 .....9

7 Figure S2..... 10

8 Figure S3..... 11

9 Figure S4..... 12

10 Figure S5.....22

11 Figure S6.....23

12 Table S3 .....24

13 Table S4. ....25

14 References.....26

15

16 **Section S1. The single particle mass spectrometer used in this study.**

17 This study employed a state-of-the-art single particle aerosol mass spectrometer with high  
18 performance (HP-SPAMS, Hexin Instrument Co., Ltd.) to investigate the chemical  
19 composition of individual particles. (Du et al., 2024; Li, 2011) Particles were directed into  
20 an aerodynamic focusing lens and propelled at velocities dictated by their size. (Carson et  
21 al., 1995; Clemen et al., 2020) The vacuum aerodynamic diameter of each particle was then  
22 determined by calculating the time delay detected by two continuous lasers (Nd: YAG, 532  
23 nm) oriented at right angles to each other. Particles are then sequentially ionized by laser  
24 desorption/ionization (LDI) technique. (Du et al., 2024; Peacock et al., 2017) Within the  
25 ion source region, particles triggered a pulsed desorption/ionization laser (Nd: YAG, 266  
26 nm), generating ion fragments. The resulting ions fly under the force of accelerating  
27 potential in a TOF-MS. (Murray et al., 2013) For each particle, both positive and negative  
28 mass spectra were recorded using a bipolar time-of-flight mass spectrometer (Fig. S1). The  
29 raw  $m/z$  are calculated by TOF data with predetermined parameters of the TOF-MS, e.g.,  
30 length of flight path and voltage of the accelerating potential.

31 The initial positions of ions before flight in the TOF-MS are deviated resulting from the  
32 focusing limit of AFL, leading to shifts in the flight path and the accelerating potential from  
33 the designed parameters (Fig. 1b), and consequently, a drift in the flight time and the  
34 corresponding  $m/z$ . (Dienes, 2003) Since the deviation is uncertain for each particle,  
35 specific coefficients are required in the calibration function for individual particles. (Chen  
36 et al., 2020; Clemen et al., 2020) Moreover, studies have shown that the inhomogeneity of  
37 ionizing laser could also influence the mass measurement. (Wenzel and Prather, 2004)

38 The power of the desorption/ionization laser was set to  $\sim 0.6$  mJ/pulse in this study. To  
39 ensure accurate size determination, the aerodynamic diameter measurements were

40 calibrated using monodisperse polystyrene latex spheres (Nanosphere size standards) with  
 41 known diameters ranging from 0.05 to 5.0  $\mu\text{m}$ . To improve data quality, all acquired single  
 42 particle mass spectra were subjected to a filtering process that set a minimum signal  
 43 threshold of 50 mV above the baseline for each  $m/z$  within the range of  $\pm (1-500)$  Th.

44 The relation between  $m/z$  and mass resolution ( $R_m$ ) is described in the empirical equation  
 45 (S1). (Du et al., 2024)The equation is used for the localization of our algorithm.

$$46 \quad R_m = -0.04549(m/z)^2 + 22.98\frac{m}{z} + 199.6 \quad (\text{S1})$$

47 The  $m/z_r$  was converted from TOF data  $t$  using equation (S2), with coefficients provided  
 48 in the following table, the unit of TOF is ns.

$$49 \quad m/z_r = \left( \frac{t - t_0}{m_0} \right)^2 \quad (\text{S2})$$

| polarity | $t_0$       | $m_0$       |
|----------|-------------|-------------|
| positive | -714.829468 | 1216.546875 |
| negative | -714.993408 | 1209.078735 |

50

51 **Section S2.** Detailed description of traits in the prototype.

52 It is essential to choose traits to establish the prototype to ensure accurate calibration of  
53 mass spectrometer spectra. Prototype is a concept borrowed from statistic machine learning,  
54 but the mechanism of prototype in our algorithm is more like the reward defined in  
55 reinforcement learning. (Hastie et al., 2009)

56 For instance, in the  $S_r$  to be calibrated, if a peak is observed around 51 Th, and the  
57 calibration target is mass deviation less than 0.025 Th, it remains uncertain whether the  
58 exact value is 50.95 Th ( $V^+$ ) or 51.00 Th ( $C_4H_3^+$ ) before calibration (in atmospheric  
59 aerosols,  $V^+$  and  $C_4H_3^+$  are only choices for a reasonable peak around 51 Th). However,  
60 suppose a calibration attempt aligns it to 51.00 Th, and simultaneously, a minor peak at  
61 52.00 Th adheres to the isotopic distribution of  $C_4H_3^+$  (i.e.,  $p(51.00 \text{ Th}): p(52.05 \text{ Th}) = 1:$   
62  $0.43$ ). In that case, this peak is likely corresponding to 51.00 Th ( $C_4H_3^+$ ). Conversely, if it  
63 is calibrated to 50.95 Th and satisfies the monoisotopic characteristic of  $V^+$ , it could be  
64 identified as 50.95 ( $V^+$ ). Additionally, if prominent peaks are both observed around 51 Th  
65 and 67 Th and a series of organic signals (e.g.,  $C_mH_n$  signals) is absent, these peaks may be  
66 identified as  $V^+$  (50.95 Th) and  $VO^+$  (66.95 Th), respectively. The isotopic distributions  
67 thus serve as traits of exact spectra. Any calibration attempt that relocates the peak contrary  
68 to these distributions would be deemed incorrect. Trait matching is considered specific  
69 because a peak matched to more than one trait is in low probability. Although it is easy to  
70 determine whether a trait is not possessed/matched by a spectrum, it is hard to judge  
71 whether a trait is truly possessed (definitely positive) by a spectrum. Once the trait is  
72 matched, it is essential to assess the behavior of  $S_t$  across the entire prototype database  
73 using the value function before confirming a trait is truly positive. Therefore, the traits that  
74 matched are only considered truly positive in  $S_{opt}$ .

75 Consider another example spectrum containing only  $C^+$  (12.00 Th),  $C_2^+$  (24.00 Th),  $C_3^+$   
76 (36.00 Th),  $C_4^+$  (48.00 Th),  $C_5^+$  (60.00 Th), and  $C_4H_3^+$ , and these peaks are collected in the  
77 prototype database. Although this information is unknown before calibration, we can  
78 evaluate any calibration attempt by matching these  $m/z$ . The optimal calibration attempt,  
79  $S_{opt}$ , would align all six peaks to their respective theoretical positions by the prototype,  
80 resulting in peaks at 12.00 Th, 24.00 Th, 36.00 Th, 48.00 Th, 60.00 Th, and 51.00 T. Any  
81  $S_t$  calibrate these peaks to other  $m/z$  position is not the optimal calibration.

82 A special type of traits is isolate ions because the trait matching of this type is certain.  
83 For instance, if we observed the presence of a peak around 12 Th. Given the mass deviation  
84 range ( $\pm 0.1$  Th at 12 Th), the only valid theoretical choice for its value would be 12.00 Th  
85 ( $C^+$ ) in atmospheric aerosol samples. Consequently, any calibration attempt that relocates  
86 this peak to a position other than 12.00 Th is miscalibration. Additionally, if a small peak  
87 is observed around 13 Th, along with a strong peak at 12 Th and following the isotope  
88 distribution of carbon, the assertion is further confirmed.

89

---

**Standard-free calibration Algorithm:** calibration core
 

---

**Input:** The raw mass spectrum *raw*, the prototype database *ptt*, the  $\theta$  space *space*.

**Output:** The optimal calibrated spectrum *opcalied*.

```

1:  maxValue = 0
2:  optCoef = 0
3:  for  $\theta$  in space
4:      S.mz =  $f(\text{raw.mz}, \theta)$ 
5:      thisValue = 0
6:      for  $T_i$  in ptt
7:          thisValue = thisValue +  $T_i.wi * \text{match}(T_i, S)$ 
8:      end for
9:      if thisValue > maxValue then
10:         maxValue = thisValue
11:         optCoef =  $\theta$ 
12:         opcalied = S
13:      end if
14:  end for
15:  return opcalied

```

---

91 The core algorithm of the match function (equation (3)) could be a modification of  
 92 binary search, or positive matrix factorization. In this study, the match function adopted a  
 93 variation of binary search with a complexity of  $O(n \log n)$  to the number of peaks in the  
 94 mass spectrum. Tolerance of mass difference was set to the resolving ability for the fuzzy  
 95 matching of  $m/z$ . In addition,  $f(\text{raw}, \theta)$  is the mass calibration function mentioned in  
 96 equation (1), and *value* is the function in equation (2).

97

98 **Section S4.** Details about determining the chemical species at ~51 Th.

99 When assigning the corresponding chemicals of peaks at 50.95 Th, all possibilities whose  
100 exact  $m/z$  in 50.925-50.975 Th should be checked. Here, we listed all species at ~50.95 Th  
101 in Table S1, and compared our result with the NIST database and the PubChem database.  
102 (Linstrom et al., 2024; Kim et al., 2023)

103 **Table S1.** Possible ions around 50.95 Th under 500-ppm accuracy.

| Ion                           | Exact $m/z$ (Th) | NIST      | PubChem   |
|-------------------------------|------------------|-----------|-----------|
| V <sup>+</sup>                | 50.9434          | Have data | Have data |
| SF <sup>+</sup>               | 50.9699          | Have data | Have data |
| ClO <sup>+</sup>              | 50.9632          | No data   | No data   |
| TiH <sub>3</sub> <sup>+</sup> | 50.9709          | No data   | No data   |

104 The SF<sup>+</sup> ion is unstable and rarely encountered in the atmosphere. Instead, the existence  
105 of V<sup>+</sup> in atmospheric aerosols has been widely reported. (Ault et al., 2010; Zhai et al., 2023;  
106 Wang et al., 2023; Passig et al., 2020, 2021; Anders et al., 2023) Therefore, we consider V<sup>+</sup> to be  
107 the corresponding species at 50.95 Th. Additionally, most 50.95-Th-containing spectra also  
108 contain peaks at 66.95 Th (the exact mass of VO<sup>+</sup>), indicating the assignment of V<sup>+</sup> at 50.95  
109 Th is self-consistent.

110 Possible ions around 51.00 Th under 500-ppm accuracy (50.925-50.975 Th) are listed  
111 below (Table S2).

112 **Table S2.** Possible ions around 51.00 Th under 500-ppm accuracy.

| Ion                            | Exact $m/z$ (Th) | NIST      | PubChem |
|--------------------------------|------------------|-----------|---------|
| AlC <sub>2</sub> <sup>+</sup>  | 50.9810          | No data   | No data |
| CBSi <sup>+</sup>              | 50.9857          | No data   | No data |
| CH <sub>2</sub> N <sup>+</sup> | 50.9870          | Have data | No data |
| LiOSi <sup>+</sup>             | 50.9872          | No data   | No data |
| FO <sub>2</sub> <sup>+</sup>   | 50.9877          | No data   | No data |



|                           |         |           |           |
|---------------------------|---------|-----------|-----------|
| $\text{H}_3\text{OS}^+$   | 50.9900 | No data   | Have data |
| $\text{H}_3\text{Mg}_2^+$ | 50.9930 | No data   | No data   |
| $\text{CH}_4\text{Cl}^+$  | 50.9996 | No data   | Have data |
| $\text{CHF}_2^+$          | 51.0041 | Have data | Have data |
| $\text{CLiO}_2^+$         | 51.0053 | No data   | No data   |
| $\text{C}_3\text{HN}^+$   | 51.0104 | Have data | Have data |
| $\text{H}_5\text{NS}^+$   | 51.0137 | No data   | No data   |
| $\text{C}_4\text{H}_3^+$  | 51.0229 | Have data | Have data |

113 The existence of most of these species has not been reported in previous studies.  
114 Elements in some species are in trace amounts in the atmosphere, including B, F, and Li.  
115 Species like  $\text{ClH}_2\text{N}^+$  have more than one heteroatom, which makes the occurrence of these  
116 species in the mass spectra lower than simple species that contain only C, H, and N. For  
117 these reasons, we only consider  $\text{C}_4\text{H}_3^+$  and  $\text{C}_3\text{NH}^+$  as candidates at 51.00 Th. As shown in  
118 Figure 5 and Figure S4, spectra containing 51.00 Th also contain peaks at 12.00 Th ( $\text{C}^+$ ),  
119 36.00 Th ( $\text{C}_3^+$ ), 37.00 Th ( $\text{C}_3\text{H}^+$ ), 38.00 Th ( $\text{C}_3\text{H}_2^+$ ), 39.00 Th ( $\text{C}_3\text{H}_3^+$ ), 43.05 Th ( $\text{C}_3\text{H}_7^+$ ),  
120 and 50.00 Th ( $\text{C}_4\text{H}_2^+$ ). The combination of all these species is consistent with the  
121 distribution pattern of  $\text{C}_m\text{H}_n^+$  fragments. Therefore, we assign 51.00 Th as  $\text{C}_4\text{H}_3^+$  in our  
122 study. Further, the existence of  $\text{C}_4\text{H}_3^+$  has been reported in previous studies (including  
123 ambient studies). (Zhai et al., 2023; Wang et al., 2023; Du et al., 2024; Xiao et al., 2018)  
124

125

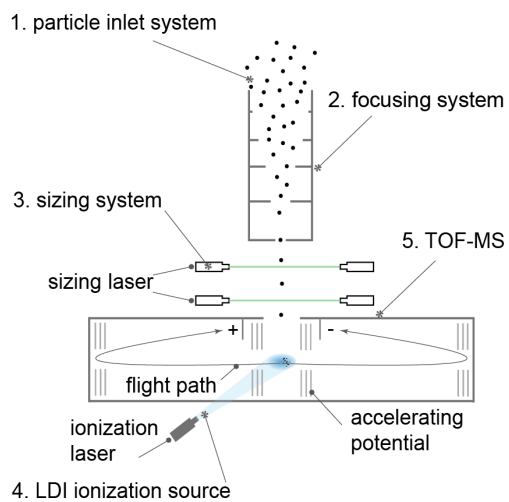

126

127 **Figure S1.** Simplified operational mechanism of the HP-SPAMS. Particle sequentially  
128 goes through stage 1-5 to generate a raw TOF spectrum.

129

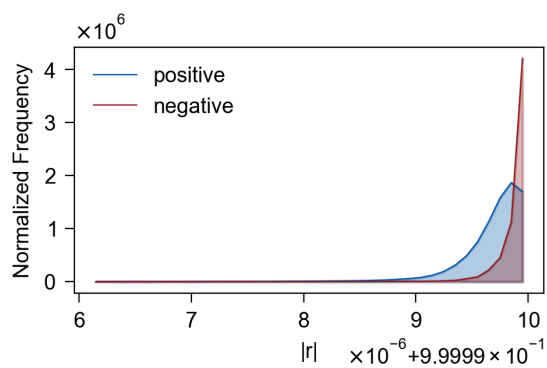

130

131 **Figure S2.** Histogram of  $|r|$  for positive and negative spectra. The histogram of  $|r|$  values  
 132 for positive and negative spectra demonstrates that all the calibrations result in  $|r|$  values  
 133 greater than 0.999996. Shaded areas are summed to 1.

134

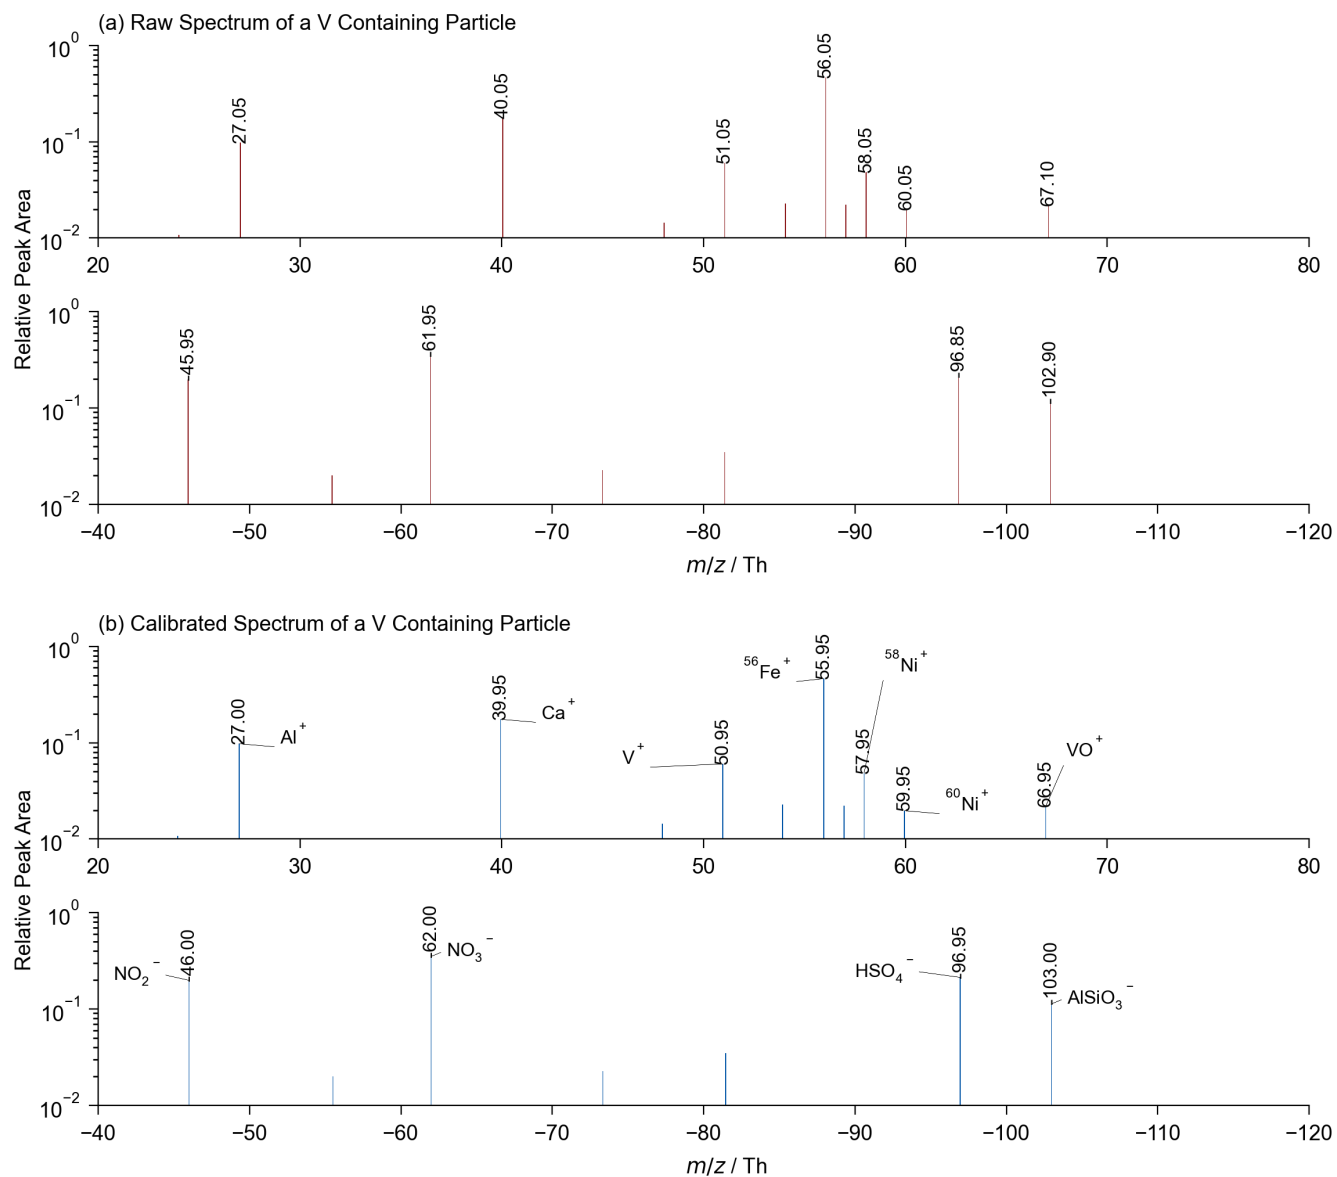

135 **Figure S3.** Example of raw (a) and calibrated (b) single-particle mass spectra of a typical  
 136 vanadium (V) containing particle.

137

138

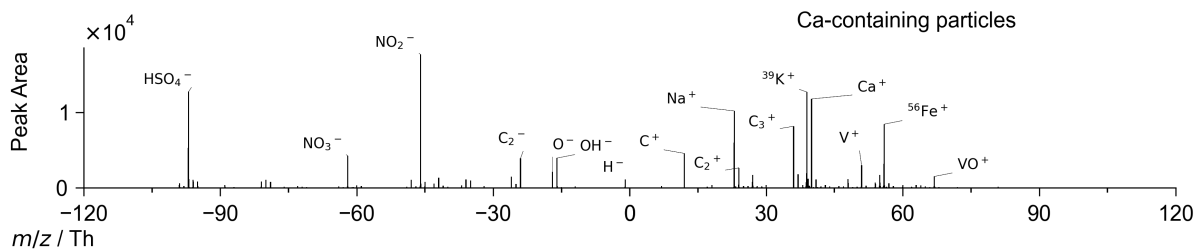

139

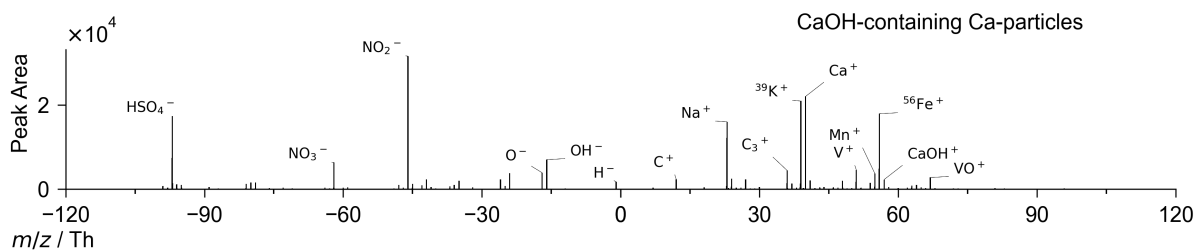

140

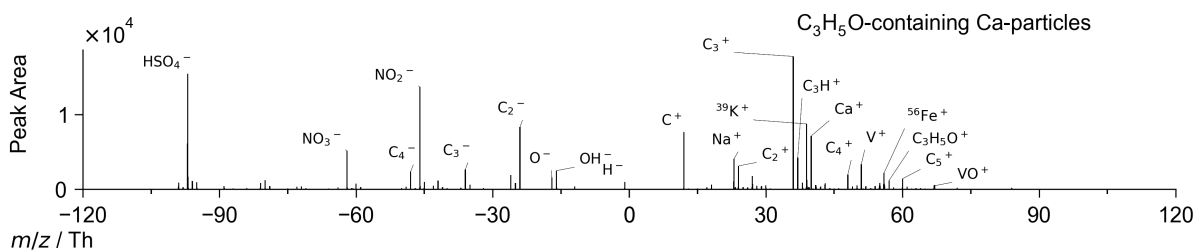

141

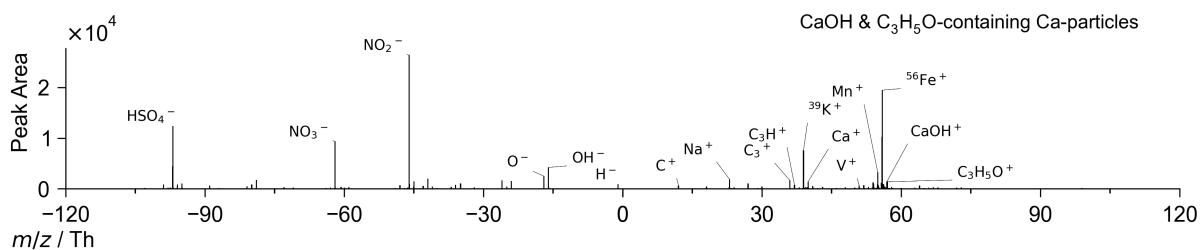

142 **Figure S4.** Averaged mass spectra of  $\text{Ca}^+$ -containing,  $\text{Ca}^+$  &  $\text{CaOH}^+$ (only)-containing,  $\text{Ca}^+$   
 143 &  $\text{C}_3\text{H}_5\text{O}^+$  (only)-containing, and  $\text{Ca}^+$  &  $\text{CaOH}^+$  &  $\text{C}_3\text{H}_5\text{O}^+$ -containing particles.

144

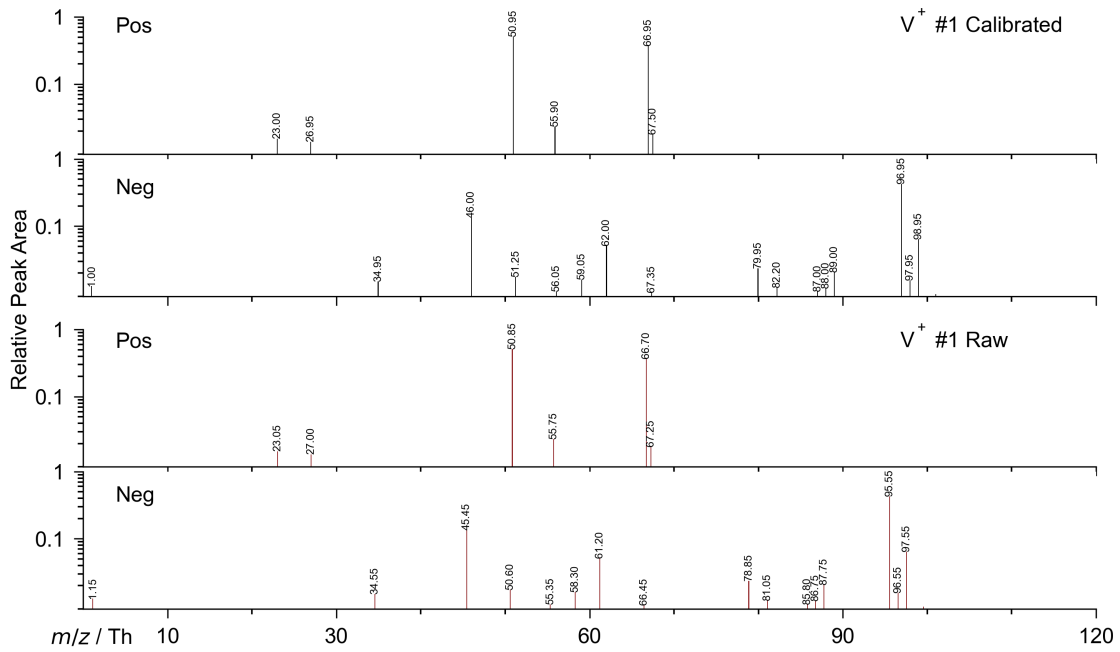

145

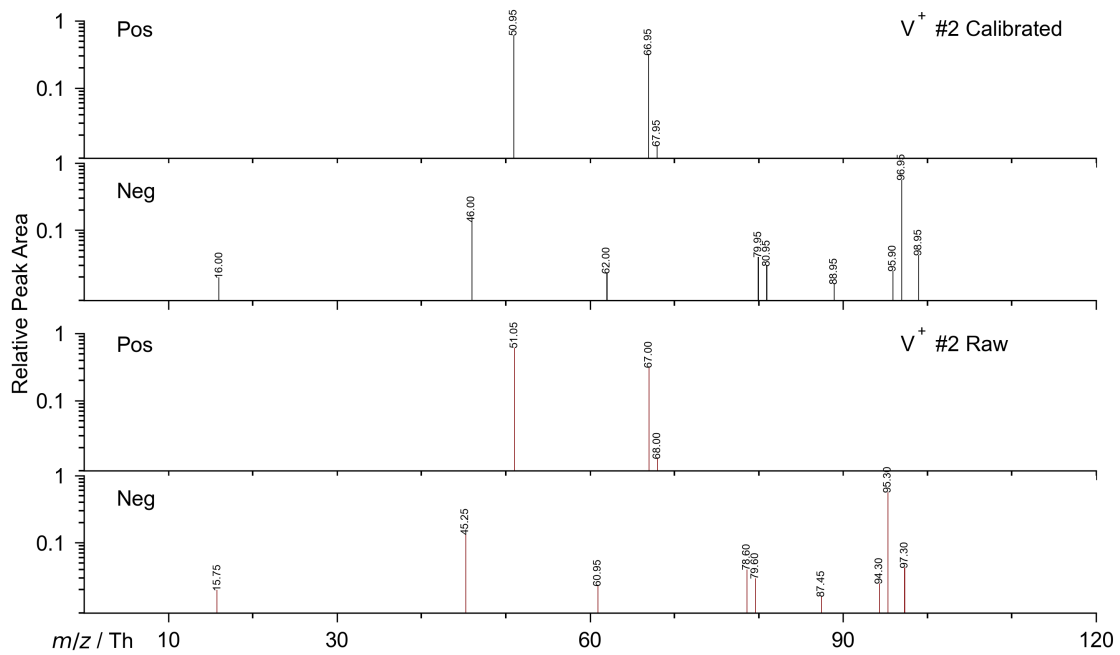

146

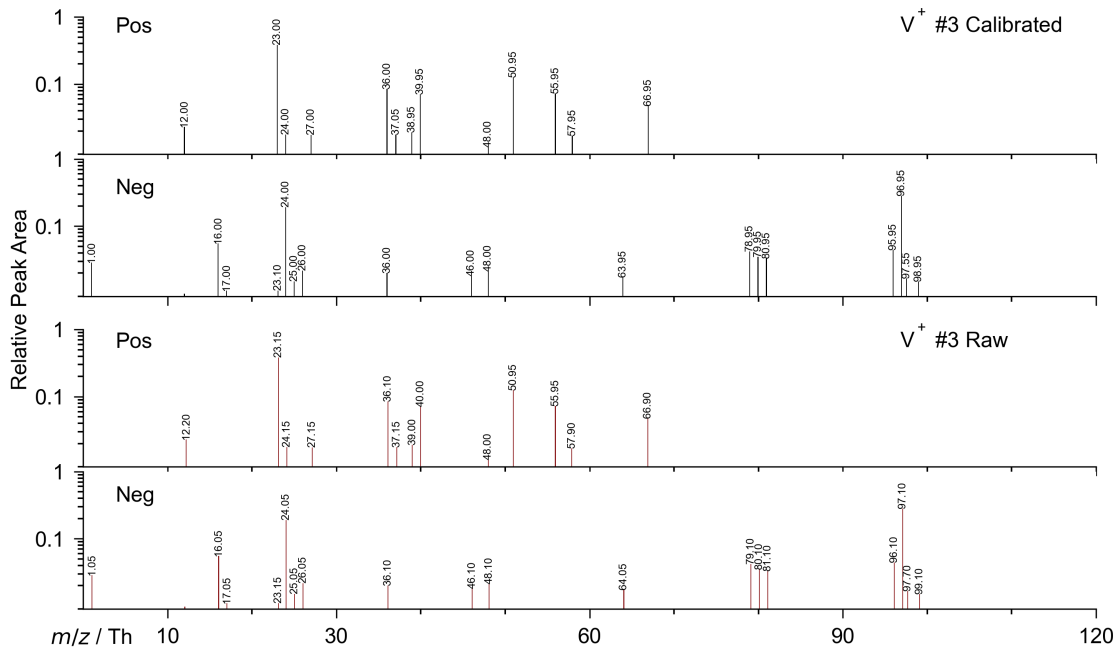

147

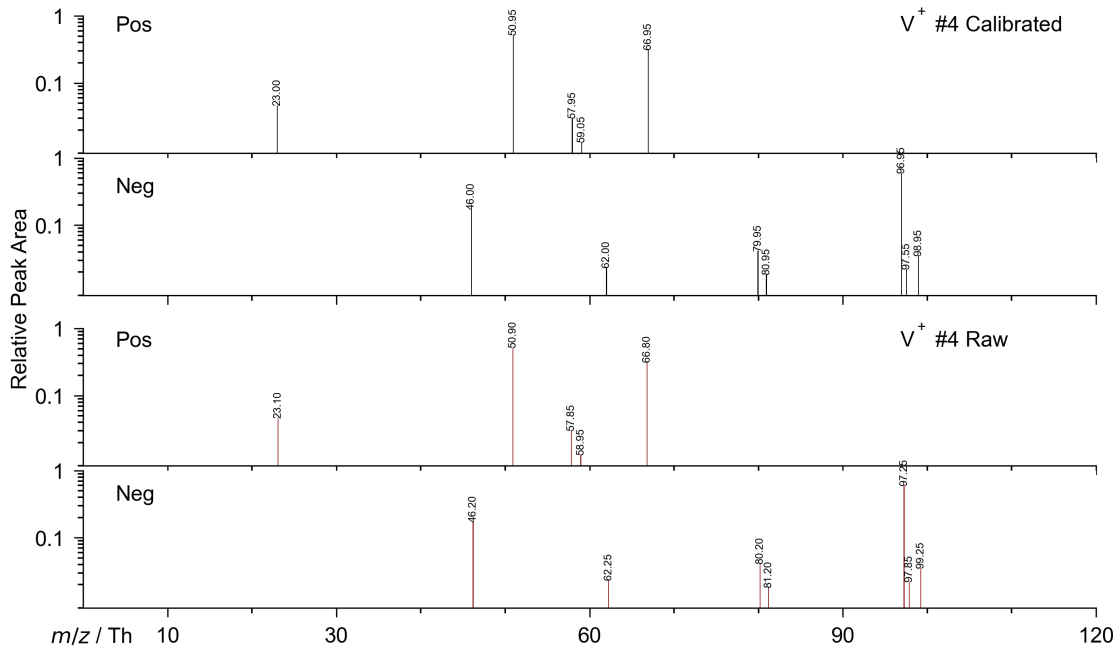

148

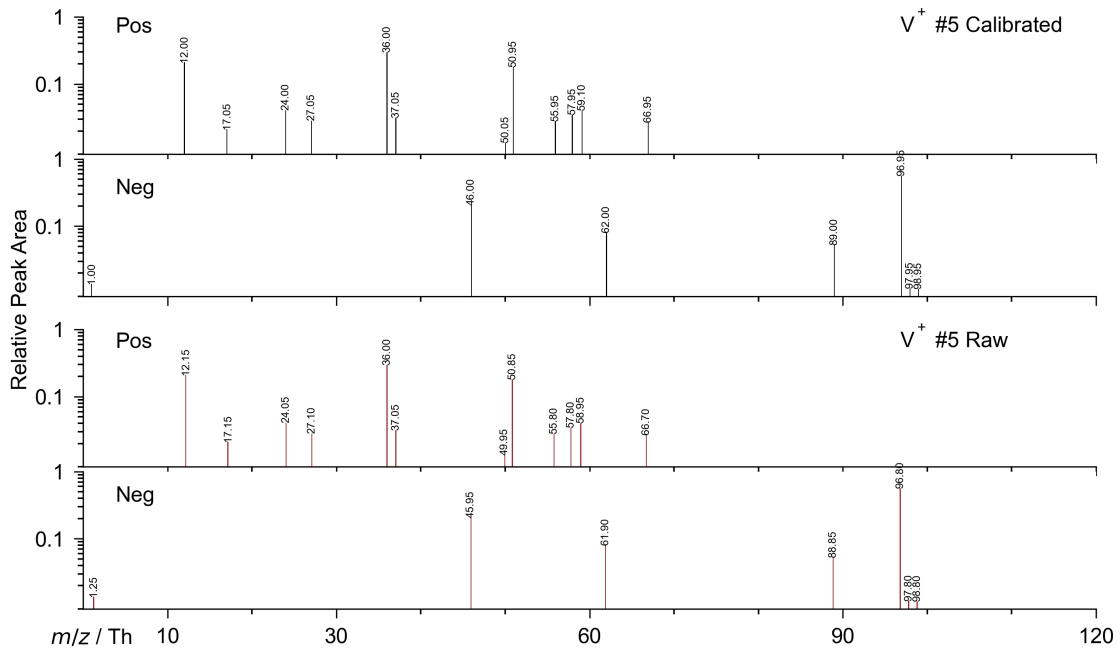

149

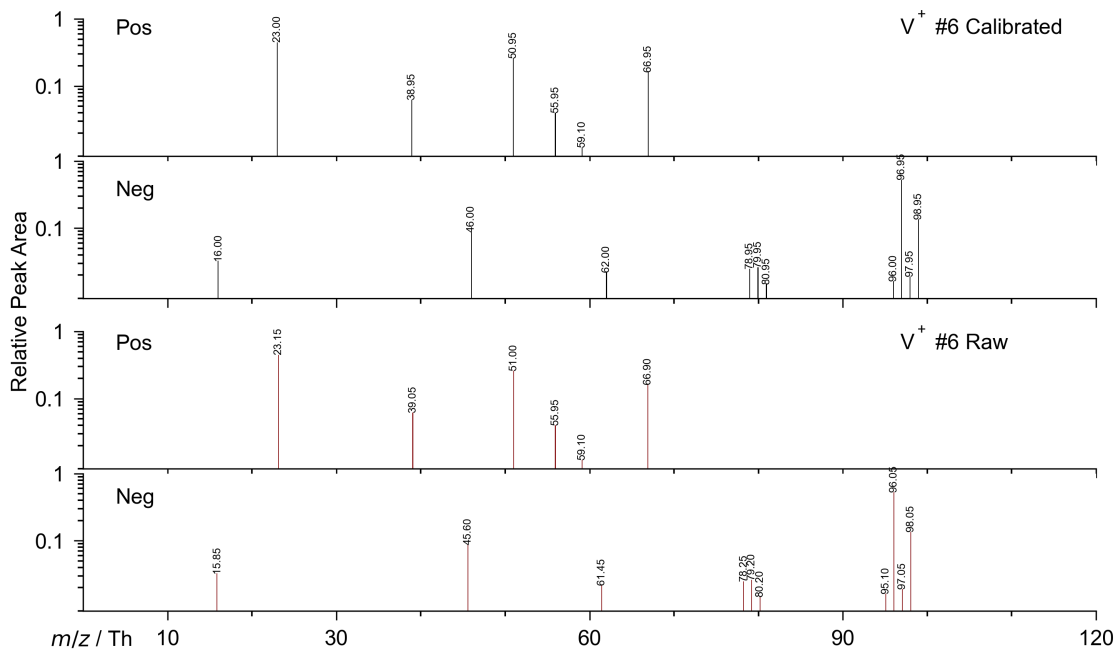

150



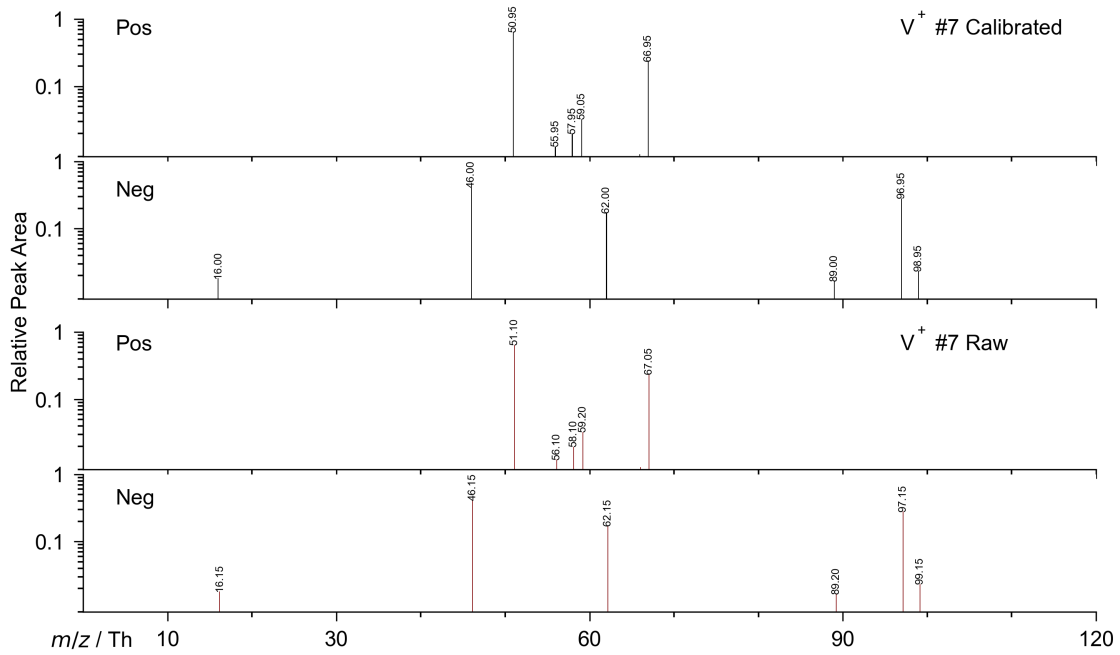

151

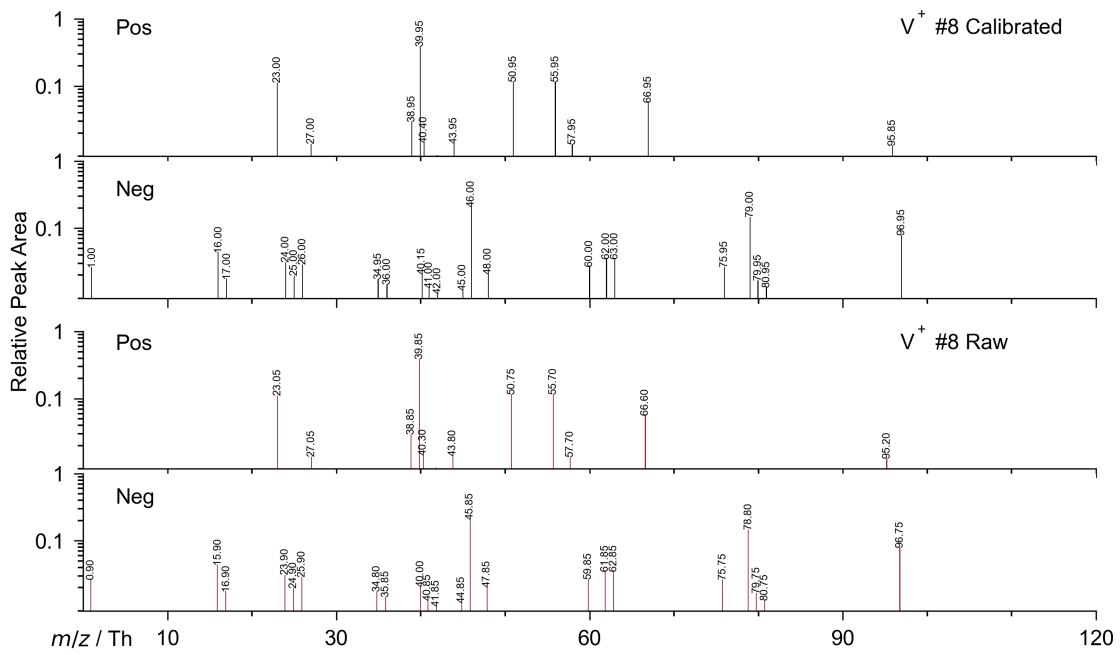

152

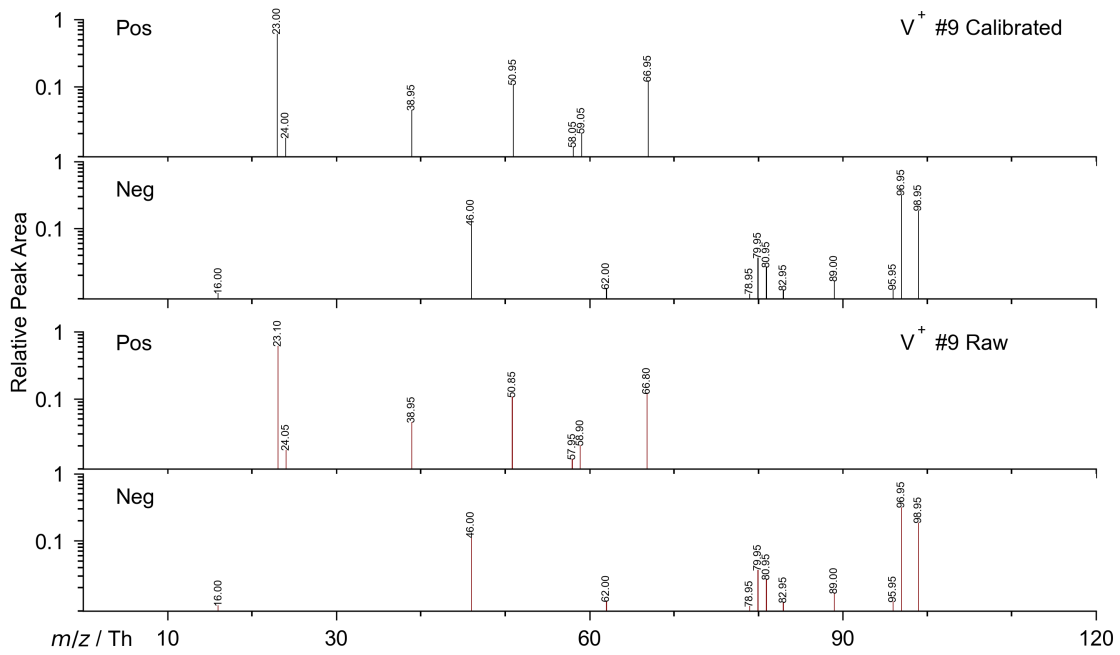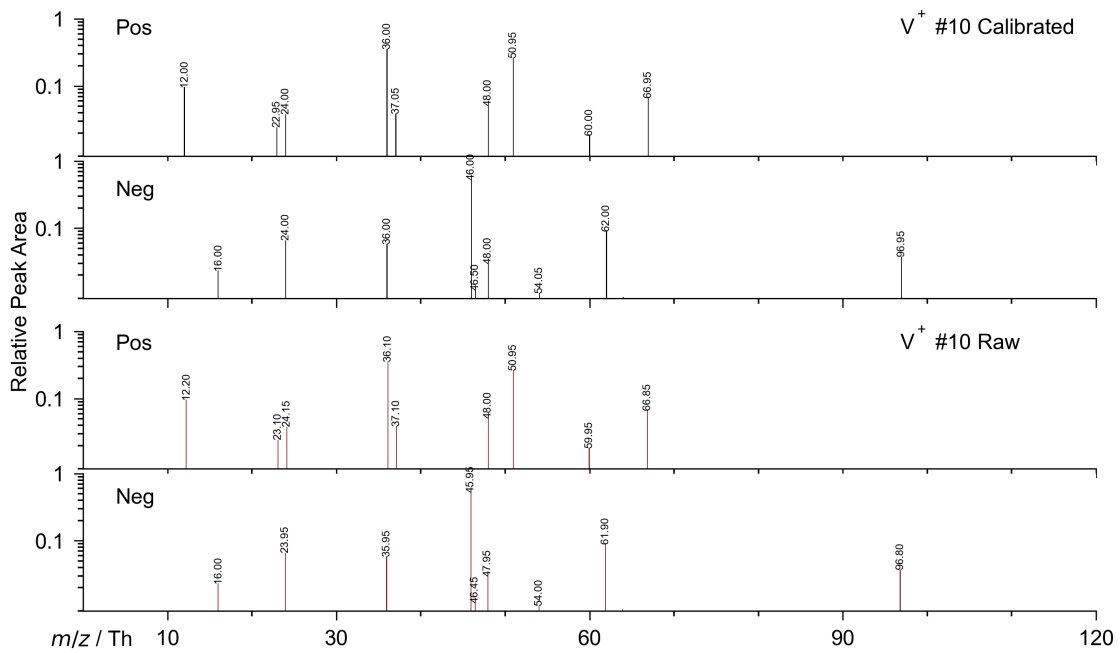

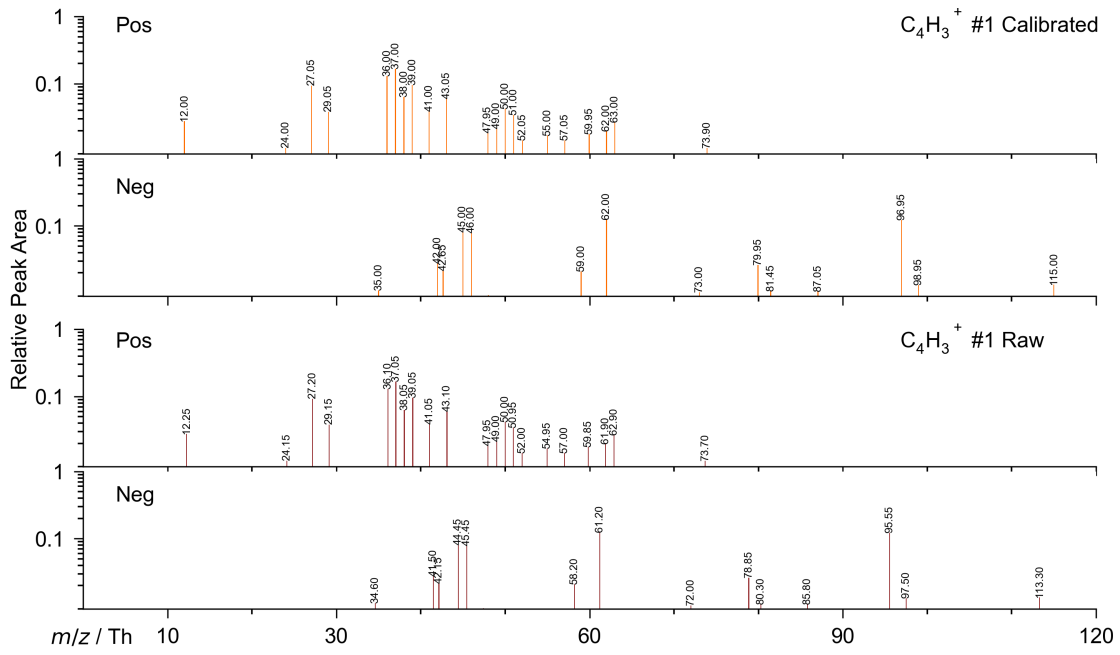

155

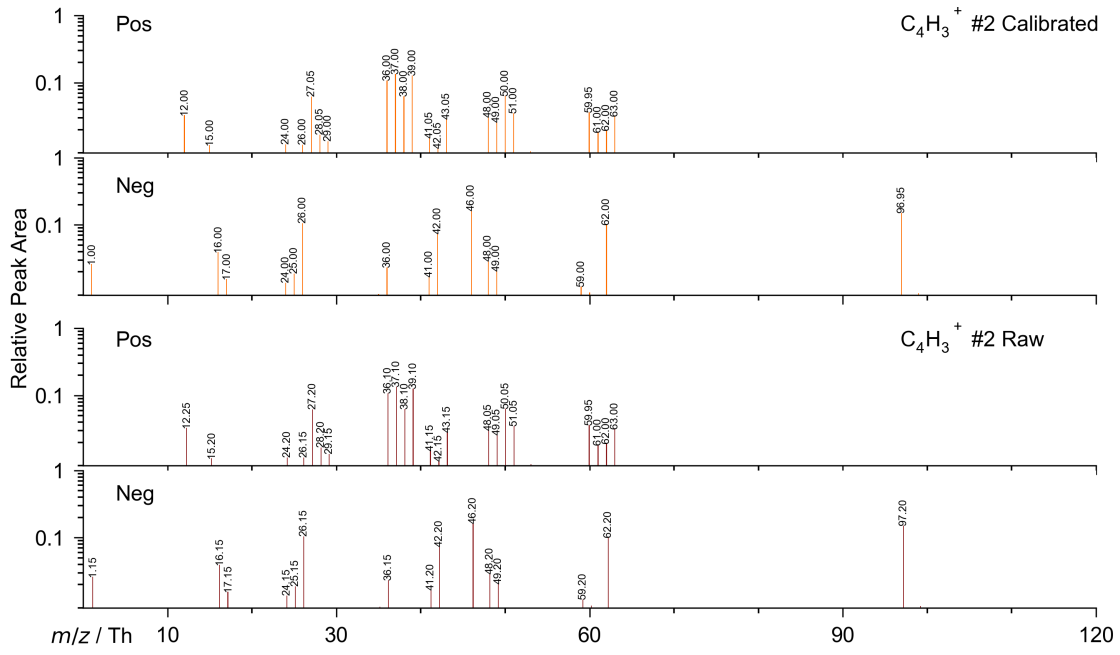

156

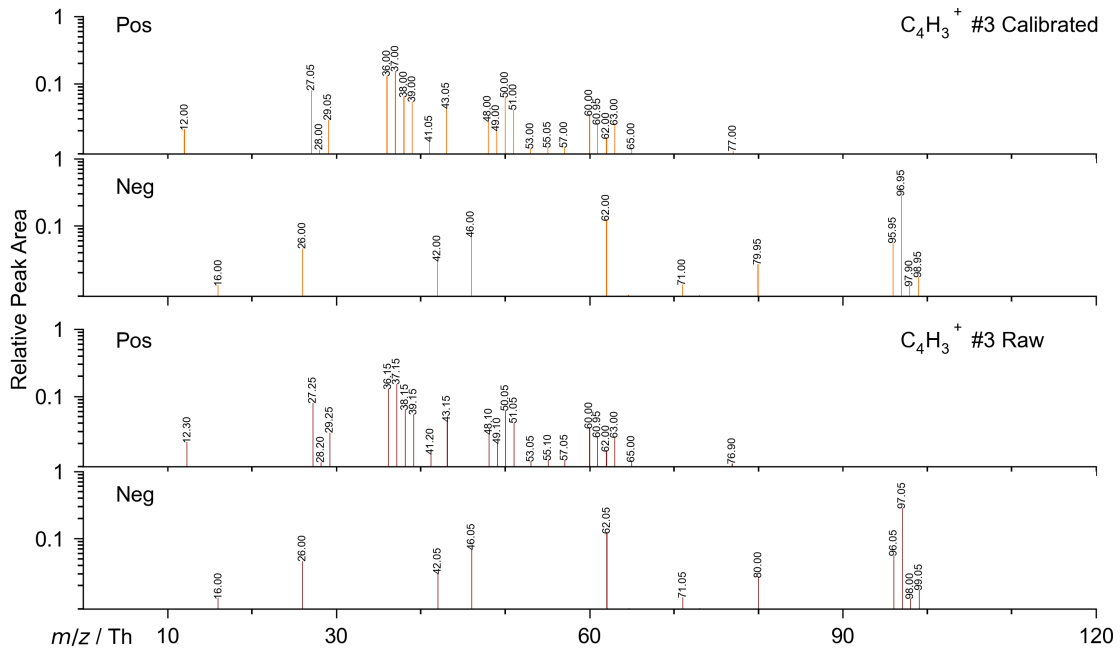

157

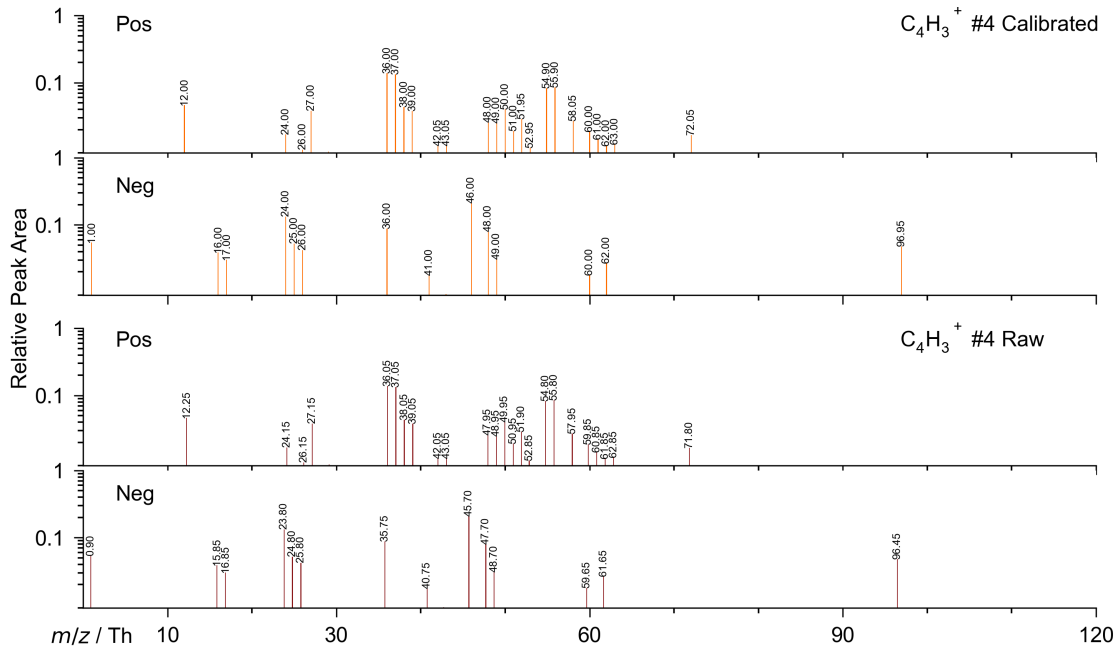

158

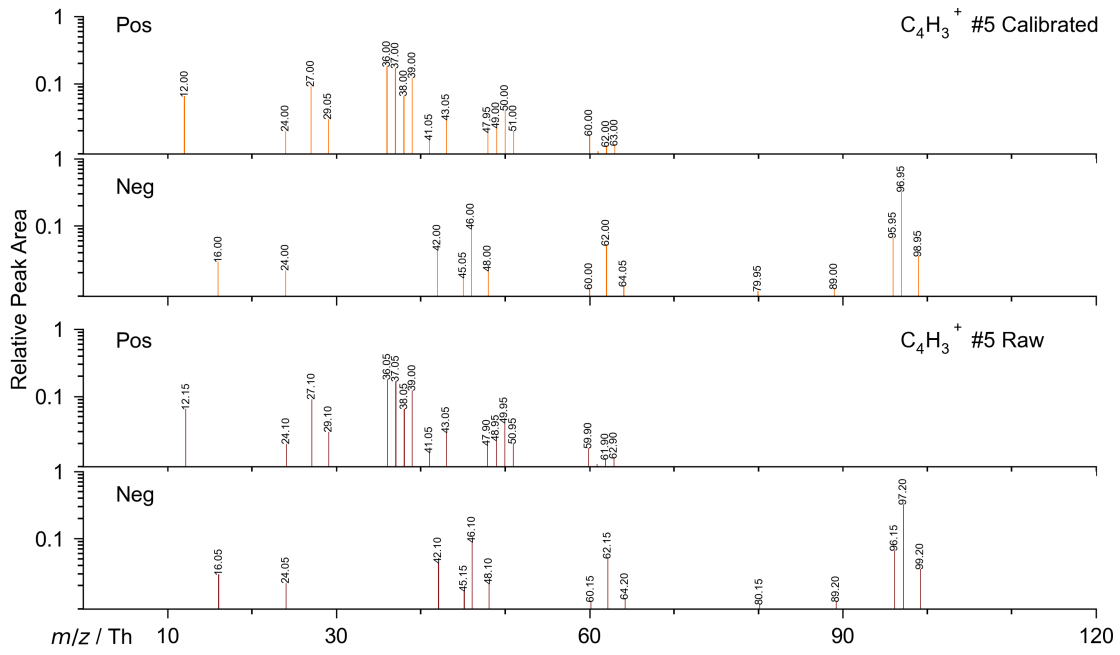

159

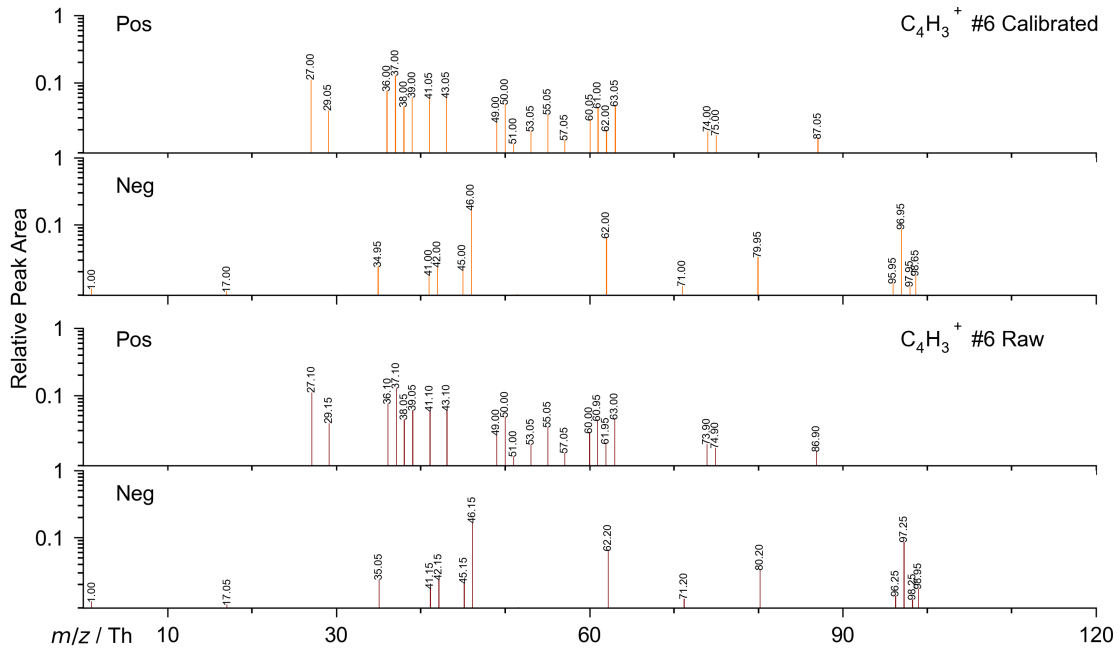

160

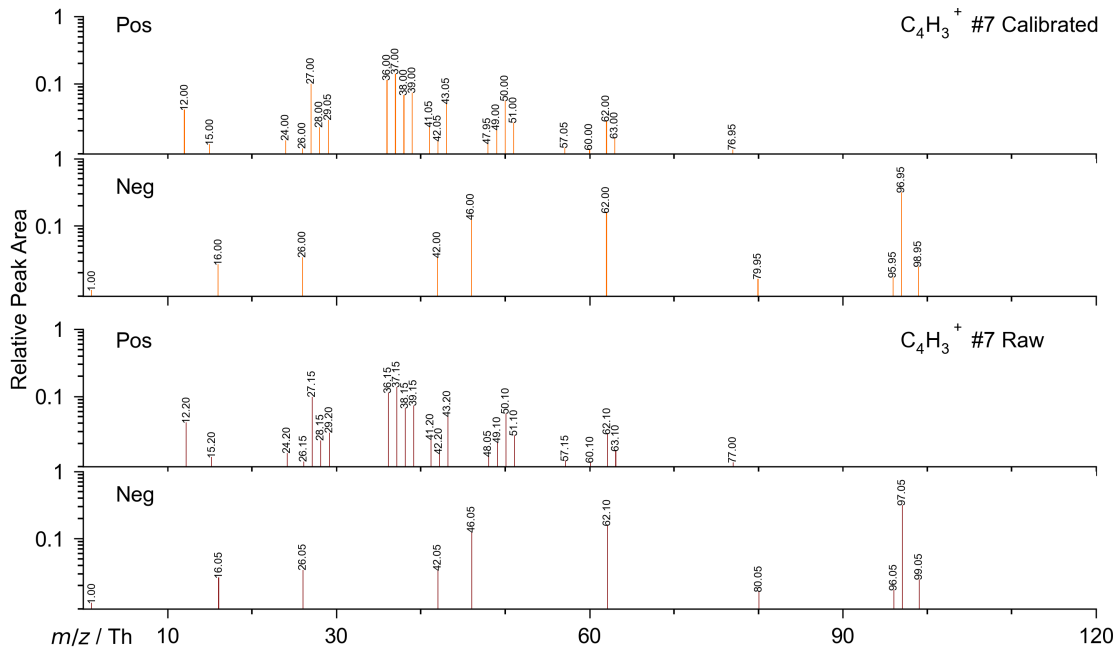

161

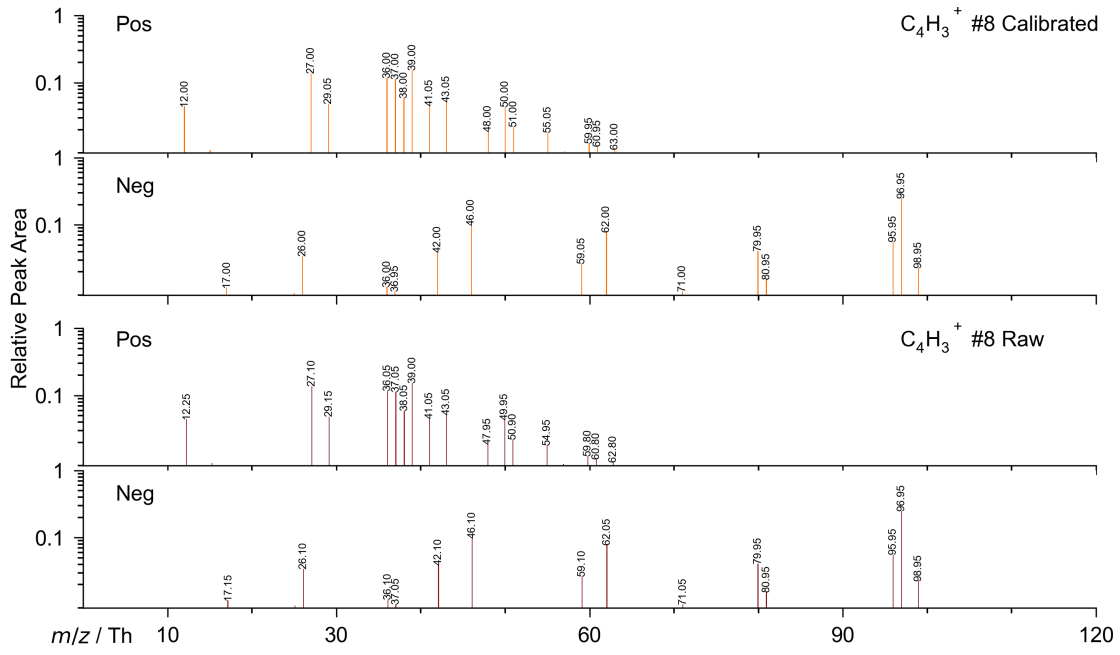

162

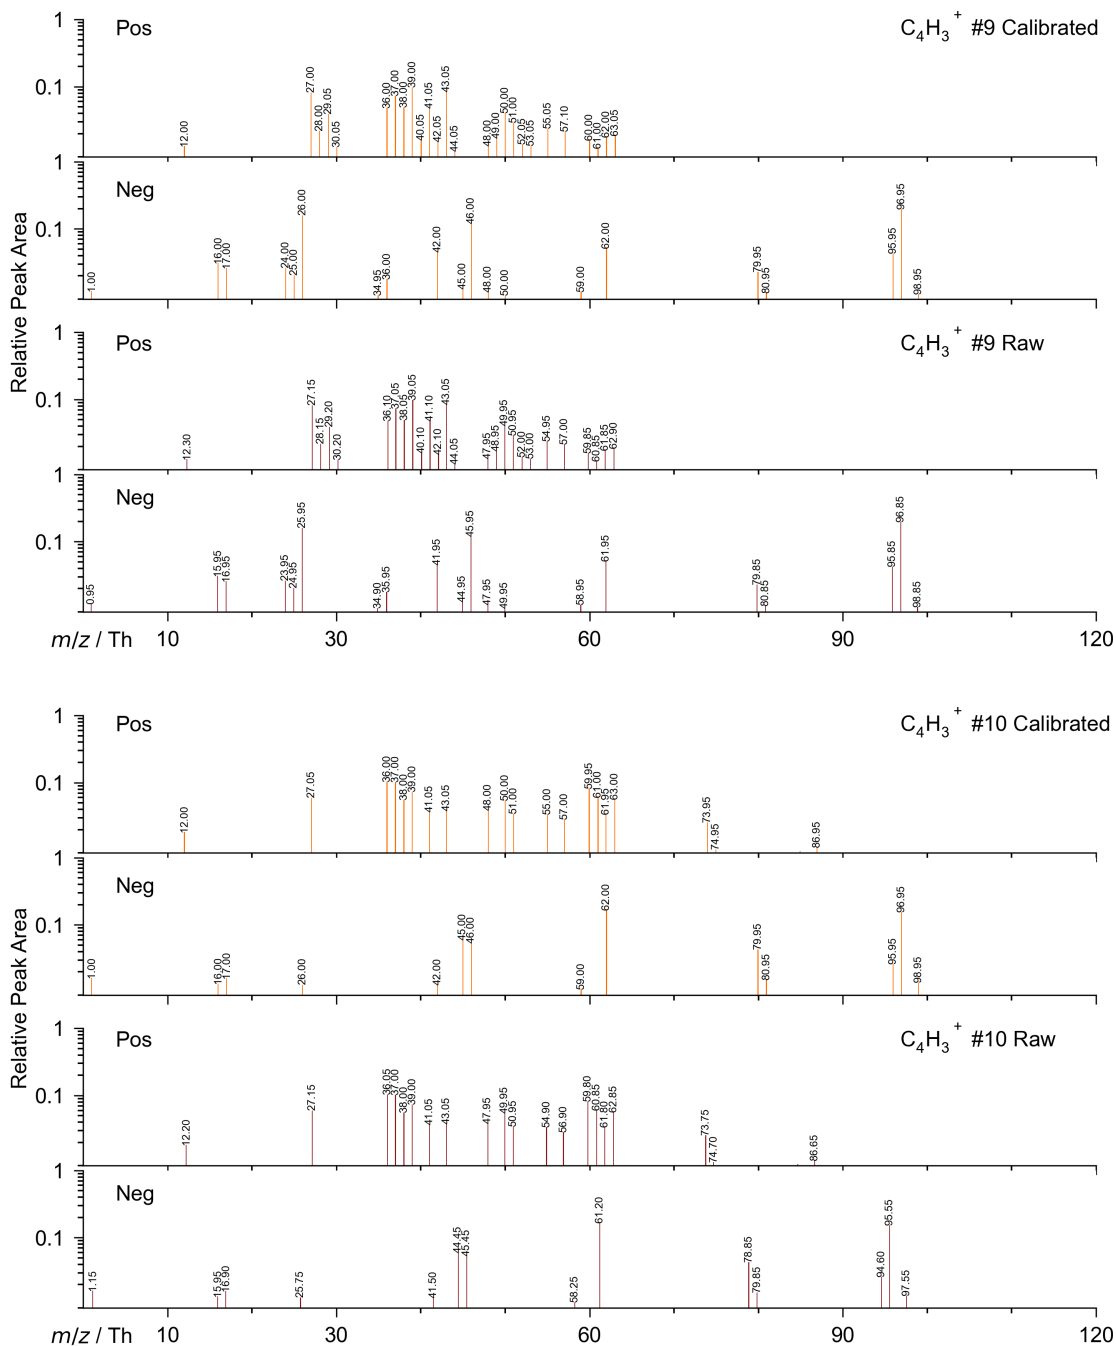

163

164

165 **Figure S5.** Examples of calibrated and raw single-particle mass spectra of  $V^+$ -containing  
 166 particles and  $C_4H_3^+$ -containing particles. The spectra are randomly chosen from the two  
 167 particle groups.

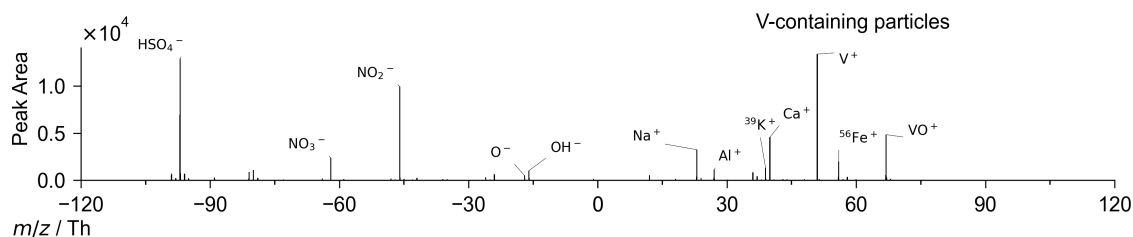

168

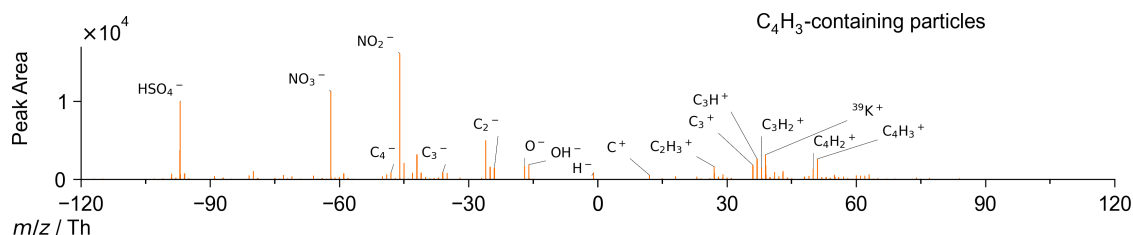

169

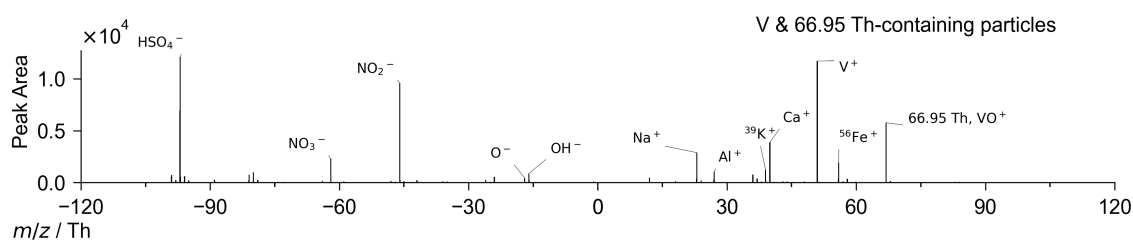

170

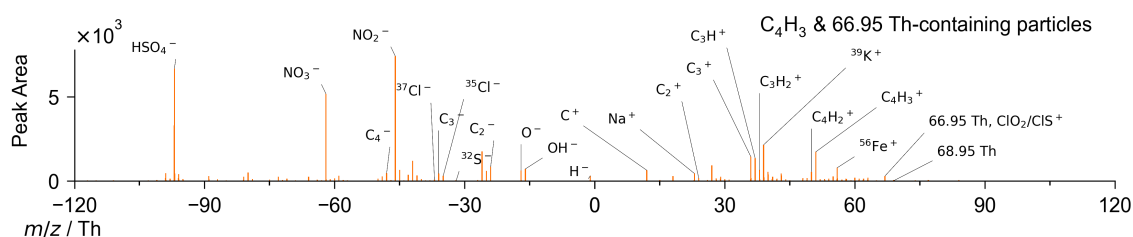

171

172 **Figure S6.** Averaged mass spectra of  $V^+$ -containing and  $C_4H_3^+$ -containing particles and  
 173  $V^+$ -containing and  $C_4H_3^+$ -containing particles that contain 66.95 Th signal. The average  
 174 peak area of 66.95 Th in the  $V^+$  group is larger than 5,500, in the  $C_4H_3^+$  group the average  
 175 peak area of 66.95 Th is  $\sim 300$  on average. The ratio of peak area of  $\sim 51$  Th to 66.95 Th in  
 176 the two groups is 2.03 and 5.79, separately. The peak-area ratio of 66.95 Th : 68.95 Th in  
 177 “ $C_4H_3$  & 66.95 Th” spectrum is 1 : 0.25 (300.10 : 72.40), the slight deviation from  
 178 theoretical value (1 : 0.32) is likely due to the approaching of the signal-noise threshold  
 179 (50), in the negative spectrum, the distribution of Cl<sup>-</sup> isotopes is -34.95 Th : -36.95 Th = 1 :  
 180 0.28 (306.92 : 87.32).

181



**Table S3.** Accuracy and resolution required for separating easily confused ions typically encountered in aerosol research (50% separation).

| Ion pair                                                      | Isotopic $m/z$ (Th) | $\Delta m/z$ (Th) | Accuracy (ppm) | Resolution (FWHM) |
|---------------------------------------------------------------|---------------------|-------------------|----------------|-------------------|
| Mg <sup>+</sup> /C <sub>2</sub> <sup>+</sup>                  | 23.9845/23.9995     | 0.0150            | 625.0          | 2400              |
| Al <sup>+</sup> /C <sub>2</sub> H <sub>3</sub> <sup>+</sup>   | 26.9810/27.0229     | 0.0419            | 1551           | 967.5             |
| Ca <sup>+</sup> /NaOH <sup>+</sup>                            | 39.9620/39.9920     | 0.0300            | 750.7          | 1998              |
| K <sup>+</sup> /C <sub>2</sub> NH <sup>+</sup>                | 38.9631/39.0104     | 0.0473            | 1212           | 1237              |
| Ti <sup>+</sup> /C <sub>4</sub> <sup>+</sup>                  | 47.9474/ 47.9995    | 0.0521            | 1085           | 1382              |
| V <sup>+</sup> /C <sub>4</sub> H <sub>3</sub> <sup>+</sup>    | 50.9434/ 51.0229    | 0.0795            | 1558           | 962.7             |
| Mn <sup>+</sup> /C <sub>3</sub> H <sub>3</sub> O <sup>+</sup> | 54.9375/55.0178     | 0.0803            | 1460           | 1028              |
| Cu <sup>+</sup> /C <sub>5</sub> H <sub>3</sub> <sup>+</sup>   | 62.9290/63.0229     | 0.0939            | 1490           | 1007              |
| Sn <sup>+</sup> /C <sub>10</sub> <sup>+</sup>                 | 119.9016/119.9995   | 0.0979            | 815.8          | 1838              |
| SO <sup>-</sup> /C <sub>4</sub> <sup>-</sup>                  | 47.9675/48.0005     | 0.0330            | 687.5          | 2183              |
| Br <sup>-</sup> /PO <sub>3</sub> <sup>-</sup>                 | 78.9189/78.9591     | 0.0402            | 509.1          | 2946              |

**Table S4.** The presence of ions in Ca<sup>+</sup>-containing particles.

| Ion                                                              | Count   | Fraction / % |
|------------------------------------------------------------------|---------|--------------|
| Ca <sup>+</sup>                                                  | 910,483 | 100          |
| CaOH <sup>+</sup>                                                | 252,160 | 28           |
| C <sub>3</sub> H <sub>5</sub> O <sup>+</sup>                     | 79,155  | 8.7          |
| CaOH <sup>+</sup> & C <sub>3</sub> H <sub>5</sub> O <sup>+</sup> | 5,601   | 0.62         |

## References

- Anders, L., Schade, J., Rosewig, E. I., Kröger-Badge, T., Irsig, R., Jeong, S., Bendl, J., Saraji-Bozorgzad, M. R., Huang, J.-H., Zhang, F.-Y., Wang, C. C., Adam, T., Sklorz, M., Etzien, U., Buchholz, B., Czech, H., Streibel, T., Passig, J., and Zimmermann, R.: Detection of ship emissions from distillate fuel operation via single-particle profiling of polycyclic aromatic hydrocarbons, *Environ. Sci.: Atmos.*, 3, 1134–1144, <https://doi.org/10.1039/D3EA00056G>, 2023.
- Ault, A. P., Gaston, C. J., Wang, Y., Dominguez, G., Thiemens, M. H., and Prather, K. A.: Characterization of the Single Particle Mixing State of Individual Ship Plume Events Measured at the Port of Los Angeles, *Environ. Sci. Technol.*, 44, 1954–1961, <https://doi.org/10.1021/es902985h>, 2010.
- Carson, P. G., Neubauer, K. R., Johnston, M. V., and Wexler, A. S.: On-line chemical analysis of aerosols by rapid single-particle mass spectrometry, *J. Aerosol Sci.*, 26, 535–545, [https://doi.org/10.1016/0021-8502\(94\)00133-J](https://doi.org/10.1016/0021-8502(94)00133-J), 1995.
- Chen, Y., Kozlovskiy, V., Du, X., Lv, J., Nikiforov, S., Yu, J., Kolosov, A., Gao, W., Zhou, Z., Huang, Z., and Li, L.: Increase of the particle hit rate in a laser single-particle mass spectrometer by pulse delayed extraction technology, *Atmos. Meas. Tech.*, 13, 941–949, <https://doi.org/10.5194/amt-13-941-2020>, 2020.
- Clemen, H.-C., Schneider, J., Klimach, T., Helleis, F., Köllner, F., Hünig, A., Rubach, F., Mertes, S., Wex, H., Stratmann, F., Welti, A., Kohl, R., Frank, F., and Borrmann, S.: Optimizing the detection, ablation, and ion extraction efficiency of a single-particle laser ablation mass spectrometer for application in environments with low aerosol particle concentrations, *Atmos. Meas. Tech.*, 13, 5923–5953, <https://doi.org/10.5194/amt-13-5923-2020>, 2020.
- Dienes, T.: Development, characterization, and refinement of a transportable aerosol time-of-flight mass spectrometer, University of California, Riverside, 2003.
- Du, X., Xie, Q., Huang, Q., Li, X., Yang, J., Hou, Z., Wang, J., Li, X., Zhou, Z., Huang, Z., Gao, W., and Li, L.: Development and characterization of a high-performance single-particle aerosol mass spectrometer (HP-SPAMS), *Atmos. Meas. Tech.*, 17, 1037–1050, <https://doi.org/10.5194/amt-17-1037-2024>, 2024.
- Hastie, T., Tibshirani, R., and Friedman, J.: *The Elements of Statistical Learning*, Springer New York, New York, NY, <https://doi.org/10.1007/978-0-387-84858-7>, 2009.
- Kim, S.; Chen, J.; Cheng, T.; Gindulyte, A.; He, J.; He, S.; Li, Q.; Shoemaker, B. A.; Thiessen, P. A., Yu, B.; Zaslavsky, L.; Zhang, J.; and Bolton, E. E. PubChem 2023

- update. *Nucleic Acids Res.*, 51(D1), D1373–D1380. <https://doi.org/10.1093/nar/gkac956>, 2023.
- Linstrom, P. J.; Mallard, W. G.; Eds., NIST Chemistry WebBook, NIST Standard Reference Database Number 69, National Institute of Standards and Technology, Gaithersburg MD, 20899, <https://doi.org/10.18434/T4D303>, 2024.
- Li, L.: Real time bipolar time-of-flight mass spectrometer for analyzing single aerosol particles, *Int. J. Mass Spectrom.*, 2011.
- Murray, K. K., Boyd, R. K., Eberlin, M. N., Langley, G. J., Li, L., and Naito, Y.: Definitions of terms relating to mass spectrometry (IUPAC Recommendations 2013), *Pure Appl. Chem.*, 85, 1515–1609, <https://doi.org/10.1351/PAC-REC-06-04-06>, 2013.
- Passig, J., Schade, J., Rosewig, E. I., Irsig, R., Kröger-Badge, T., Czech, H., Sklorz, M., Streibel, T., Li, L., Li, X., Zhou, Z., Fallgren, H., Moldanova, J., and Zimmermann, R.: Resonance-enhanced detection of metals in aerosols using single-particle mass spectrometry, *Atmos. Chem. Phys.*, 20, 7139–7152, <https://doi.org/10.5194/acp-20-7139-2020>, 2020.
- Passig, J., Schade, J., Irsig, R., Li, L., Li, X., Zhou, Z., Adam, T., and Zimmermann, R.: Detection of ship plumes from residual fuel operation in emission control areas using single-particle mass spectrometry, *Atmos. Meas. Tech.*, 14, 4171–4185, <https://doi.org/10.5194/amt-14-4171-2021>, 2021.
- Peacock, P. M., Zhang, W.-J., and Trimpin, S.: Advances in Ionization for Mass Spectrometry, *Anal. Chem.*, 89, 372–388, <https://doi.org/10.1021/acs.analchem.6b04348>, 2017.
- Wang, G., Ruser, H., Schade, J., Passig, J., Adam, T., Dollinger, G., and Zimmermann, R.: 1D-CNN Network Based Real-Time Aerosol Particle Classification With Single-Particle Mass Spectrometry, *IEEE Sens. Lett.*, 7, 1–4, <https://doi.org/10.1109/LENS.2023.3315554>, 2023.
- Wenzel, R. J. and Prather, K. A.: Improvements in ion signal reproducibility obtained using a homogeneous laser beam for on-line laser desorption/ionization of single particles, *Rapid Commun. Mass Spectrom.*, 18, 1525–1533, <https://doi.org/10.1002/rcm.1509>, 2004.
- Xiao, Q., Li, M., Liu, H., Fu, M., Deng, F., Lv, Z., Man, H., Jin, X., Liu, S., and He, K.: Characteristics of marine shipping emissions at berth: profiles for particulate matter and volatile organic compounds, *Atmos. Chem. Phys.*, 18, 9527–9545, <https://doi.org/10.5194/acp-18-9527-2018>, 2018.

Zhai, J., Yu, G., Zhang, J., Shi, S., Yuan, Y., Jiang, S., Xing, C., Cai, B., Zeng, Y., Wang, Y., Zhang, A., Zhang, Y., Fu, T.-M., Zhu, L., Shen, H., Ye, J., Wang, C., Tao, S., Li, M., Zhang, Y., and Yang, X.: Impact of Ship Emissions on Air Quality in the Greater Bay Area in China under the Latest Global Marine Fuel Regulation, *Environ. Sci. Technol.*, 57, 12341–12350, <https://doi.org/10.1021/acs.est.3c03950>, 2023.
